# Supplementary material for: Reduced Metabotropic Glutamate Receptor 5 Density in Major Depression Determined by [11C]ABP688 PET and Postmortem Study
Source: Atypon-hosted journal article supplement (doi:10.1176/appi.ajp.2011.09111607), 2011-04-16

## Supplementary Tables and Figures

**TABLE S1. Clinical Characteristics of the 11 Subjects With Major Depressive Disorder Included in PET Study**

| Clinical Characteristic    | Category, Unit                   | Value                 |
|----------------------------|----------------------------------|-----------------------|
| BDI score                  | Mean (SD), range                 | 25.3 (8.0), 13 to 35  |
| BAI score                  | Mean (SD), range                 | 18.6 (10.5), 6 to 37  |
| Age at onset               | Mean (SD), range, in years       | 26.1 (13.9), 17 to 42 |
| Episode duration           | Mean (SD), range, in months      | 59.8 (48.1), 9 to 138 |
| Total illness duration     | Mean (SD), range, in years       | 14.73 (11.3), 3 to 42 |
| Course of Major Depression | Single MDE (N)                   | 1                     |
|                            | 2 or 3 MDEs (N)                  | 4                     |
|                            | >3 MDEs (N)                      | 4                     |
|                            | Chronic course                   | 2                     |
| Time medication-free       | Mean (SD), range, in months      | 15.3 (13.2), 1 to 39  |
|                            | Never medicated (N)              | 4                     |
| Comorbid diagnoses         | Generalized anxiety disorder (N) | 1                     |
|                            | Panic disorder (N)               | 1                     |
|                            | Social phobia (N)                | 1                     |
| History of suicidality     | Suicide attempt/s (N)            | 1                     |
| Depression subtypes        | Melancholic (N)                  | 1                     |
|                            | Atypical (N)                     | 0                     |
| Family history             | Major depressive disorder (N)    | 6                     |
|                            | Bipolar disorders (N)            | 1                     |
|                            | Anxiety disorders (N)            | 1                     |
|                            | Alcohol use disorders (N)        | 6                     |

BDI=Beck Depression Inventory, BAI=Beck Anxiety Inventory, SD=standard deviation

**FIGURE S1. Typical tissue time-activity curves after injecting half the activity as a bolus and the other half as a constant infusion until 60 minutes. The activity reaches a steady state at 30 minutes. At equilibrium, the ratio of the tracer concentration in tissue and blood is directly representing the total distribution volume of the tracer, which itself is directly related to receptor density (Blasberg et al., 1989; Carson et al, 1993).**

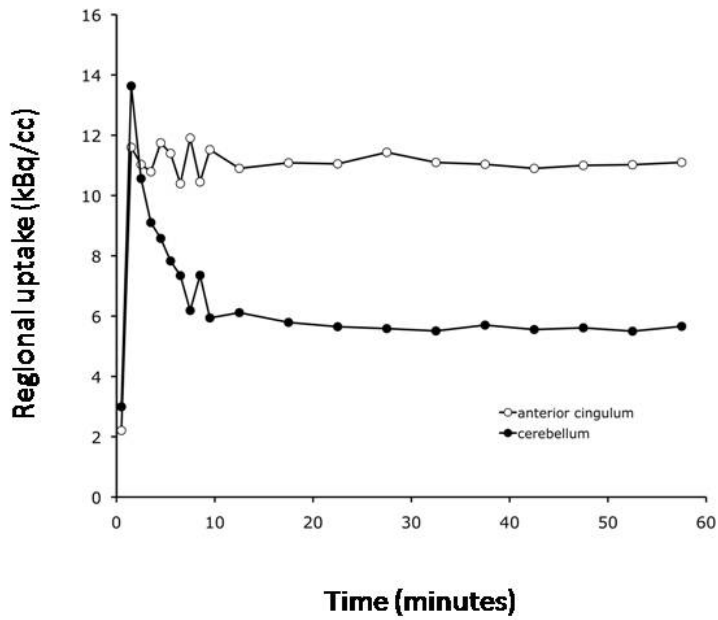

**TABLE S2. Summary of Clinical Characteristics of Subjects Included in Postmortem Study**

| Clinical Characteristic         | Healthy Controls (n=15)                 | Major Depression (n=15)                                           |
|---------------------------------|-----------------------------------------|-------------------------------------------------------------------|
| Age*                            | 49 (14.9) years                         | 52 (14.5) years                                                   |
| Postmortem interval*            | 17 (5.7) hours                          | 23 (4.8) hours                                                    |
| pH*                             | 6.68 (0.31)                             | 6.52 (0.27)                                                       |
| Gender (female/male)            | 3/12                                    | 3/12                                                              |
| Time in freezer*                | 141 (24) months                         | 137 (41) months                                                   |
| Medication history <sup>a</sup> | none                                    | n=4 (sertraline, n=2; fluoxetine, n=1; imipramine, n=1)           |
| Comorbid diagnosis              | History of alcohol abuse, n=3           | Alcohol abuse, n=2; history of alcohol abuse, n=2; dysthymia, n=1 |
| Smoking                         | Smokers, n=5<br>History of smoking, n=2 | Smokers, n=5                                                      |
| Suicide                         | none                                    | n=11                                                              |

\* Mean (SD).

<sup>a</sup> prescriptions for antidepressants within 4 weeks prior to death; none of the 15 depressed subjects had antidepressants present in their postmortem toxicology screening.

**TABLE S3. Clinical Characteristics of Individual Subjects Included in Postmortem Study**

| Healthy Controls<br>(pair no.) | Age | Sex | PMI | Brain pH | Toxicology                     | Cause of death             |
|--------------------------------|-----|-----|-----|----------|--------------------------------|----------------------------|
| 1                              | 30  | M   | 19  | 6.98     | Clean                          | Heart disease              |
| 2                              | 33  | M   | 23  | 6.86     | Clean                          | Heart disease              |
| 3                              | 27  | F   | 15  | 7.01     | Clean                          | Heart disease              |
| 4                              | 37  | F   | 13  | 5.93     | Clean                          | Viral myocarditis          |
| 5                              | 51  | F   | 22  | 6.30     | Clean                          | Heart disease              |
| 6                              | 46  | M   | 11  | 6.95     | Clean                          | Heart disease              |
| 7                              | 54  | M   | 17  | 6.87     | Brompheniramine                | Heart disease              |
| 8                              | 69  | M   | 26  | 6.70     | Clean                          | Heart disease              |
| 9                              | 70  | M   | 20  | 6.81     | Clean                          | Heart disease              |
| 10                             | 74  | M   | 21  | 6.62     | Clean                          | Abdominal aortic aneurysm  |
| 11                             | 59  | M   | 6   | 6.79     | Lidocaine                      | Heart disease              |
| 12                             | 34  | M   | 24  | 6.61     | Ethanol                        | Thrombophlebitis           |
| 13                             | 54  | M   | 19  | 6.52     | Lidocaine                      | Heart disease              |
| 14*                            | 52  | M   | 17  | 6.28     | Clean                          | Heart disease              |
| 15*                            | 48  | M   | 9   | 6.98     | Clean                          | Heart disease              |
| Major Depression<br>(pair no.) |     |     |     |          |                                |                            |
| 1                              | 41  | M   | 19  | 6.24     | Chlorpheniramine               | Heart disease              |
| 2                              | 30  | M   | 18  | 6.91     | Ethanol                        | Suicide (gunshot to chest) |
| 3                              | 34  | F   | 24  | 6.27     | Ethanol, CO, alprazolam        | Suicide (CO poisoning)     |
| 4                              | 40  | F   | 25  | 6.32     | Morphine, codeine, hydrocodone | Heart disease              |
| 5                              | 50  | F   | 28  | 6.47     | Dextromethorphan               | Cardiovascular disease     |
| 6                              | 46  | M   | 17  | 6.26     | Clean                          | Homicide                   |
| 7                              | 54  | M   | 23  | 6.24     | Phenobarbital, phenytoin, CO   | Suicide (CO poisoning)     |
| 8                              | 64  | M   | 26  | 6.85     | Ethanol                        | Suicide (gun shot to head) |
| 9                              | 74  | M   | 25  | 6.67     | Diazepam                       | Suicide (gunshot to head)  |
| 10                             | 81  | M   | 33  | 6.78     | Clean                          | Suicide (drowning)         |
| 11                             | 60  | M   | 20  | 6.31     | Ethanol                        | Suicide (gunshot to chest) |
| 12                             | 42  | M   | 20  | 6.80     | Clean                          | Suicide (gunshot to chest) |
| 13                             | 52  | M   | 17  | 6.48     | CO                             | Suicide (CO poisoning)     |
| 14*                            | 48  | M   | 21  | 6.90     | Flurazepam                     | Suicide (gunshot to chest) |
| 15*                            | 65  | M   | 30  | 6.24     | Codeine                        | Suicide (gunshot to chest) |

M, male; F, female; PMI, postmortem interval; CO, carbon monoxide. \* subjects not included in mGluR1 study

**TABLE S4. Brain Regions With Negative Correlations Between Clinical Symptoms and [<sup>11</sup>C]ABP688 DVR in Subjects With Major Depressive Disorder (N=11)**

| Brain Regions                                        | x y z coordinates <sup>b</sup> | t-values          |
|------------------------------------------------------|--------------------------------|-------------------|
| Negative Correlations with Beck Depression Inventory |                                |                   |
| R hippocampal formation                              | 22, 38, 7                      | 9.22 <sup>a</sup> |
| L hippocampal formation                              | -26, -39, 6                    | 4.41              |
| Negative Correlations with Beck Anxiety Inventory    |                                |                   |
| R thalamus                                           | 14, -13, 3                     | 5.53              |
| L thalamus                                           | -10, -19, 1                    | 5.24              |
| R medial orbital cortex (Brodmann's area 11)         | 26, 36, -22                    | 4.81              |
| R frontal polar cortex (Brodmann's area 10)          | 34, 62, -10                    | 4.77              |
| L lateral orbital cortex (Brodmann's area 11/47)     | -46, 34, -15                   | 4.58              |
| L mid-cingulate cortex                               | -22, -31, 44                   | 4.43              |

All results were significant at  $p_{\text{uncorrected}} < 0.001$ .

<sup>a</sup> Cluster-level, corrected p value = 0.029 after applying the cluster test for multiple testing

<sup>b</sup> Coordinates correspond to the stereotaxic array of Talairach and Tournoux (1988)

**FIGURE S2.** Column scatter graphs displaying mGluR5 DVR in the 11 depressed subjects found in the PET study within the right frontal polar cortex (Brodmann's area 10; see method section). Gray shading indicates that the data was derived from subjects suffering from a comorbid anxiety disorder. Triangles indicate that data were derived from subjects who were drug-naïve at the time of the study.

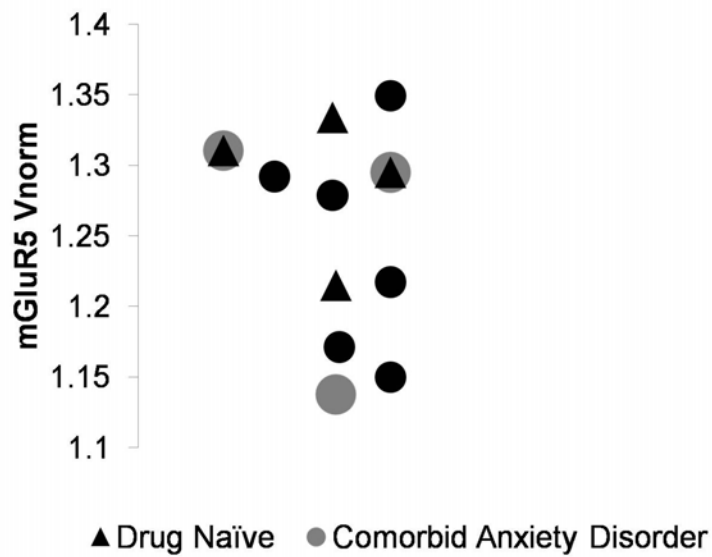

Figure S3. mGluR5 immunoreactivity detected in prefrontal cortex (lanes 1 and 2) and in cerebellum (lanes 3 and 4) from two psychiatrically healthy controls. Each well was loaded with 15µg of total protein. The bottom panel shows immunoreactive actin detected on the same blot as a control for protein loading.

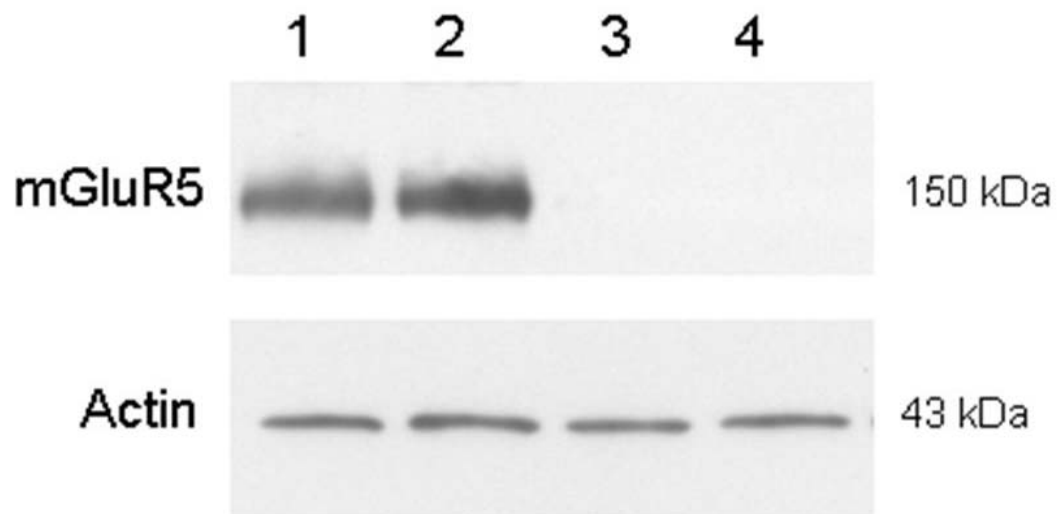

Supplement: ajp_168_07_727_01.pdf [file ajp_168_07_727_01.pdf]
